# Supplementary material
Source: PubMed Central journal article supplement (PMC5970019)
Supplement: NIHMS936301-supplement-2.pdf [file NIHMS936301-supplement-2.pdf]

## A facile approach to enhance antigen response for personalized cancer vaccination

Aileen Weiwei Li<sup>1,2</sup>, Miguel C. Sobral<sup>1,2</sup>, Soumya Badrinath<sup>3</sup>, Youngjin Choi<sup>4</sup>, Amanda Graveline<sup>2</sup>, Alexander G. Stafford<sup>2</sup>, James C. Weaver<sup>2</sup>, Maxence O. Dellacherie<sup>1,2</sup>, Ting-Yu Shih<sup>1,2</sup>, Omar A. Ali<sup>2</sup>, Jaeyun Kim<sup>4-6</sup>, Kai W. Wucherpfennig<sup>3</sup>, and David J. Mooney<sup>1,2</sup>

1. John A Paulson School of Engineering and Applied Sciences, Harvard University, Cambridge, MA, USA
2. Wyss Institute for Biologically Inspired Engineering, Harvard University, Boston, MA, USA
3. Department of Cancer Immunology and Virology, Dana-Farber Cancer Institute, Boston, MA, USA
4. School of Chemical Engineering, Sungkyunkwan University, Republic of Korea
5. Department of Health Sciences and Technology, Samsung Advanced Institute for Health Science & Technology, Sungkyunkwan University, Republic of Korea
6. Biomedical Institute for Convergence, Sungkyunkwan University, Republic of Korea

Correspondence should be addressed to D.J.M. ([mooneyd@seas.harvard.edu](mailto:mooneyd@seas.harvard.edu)).

Supplementary information:

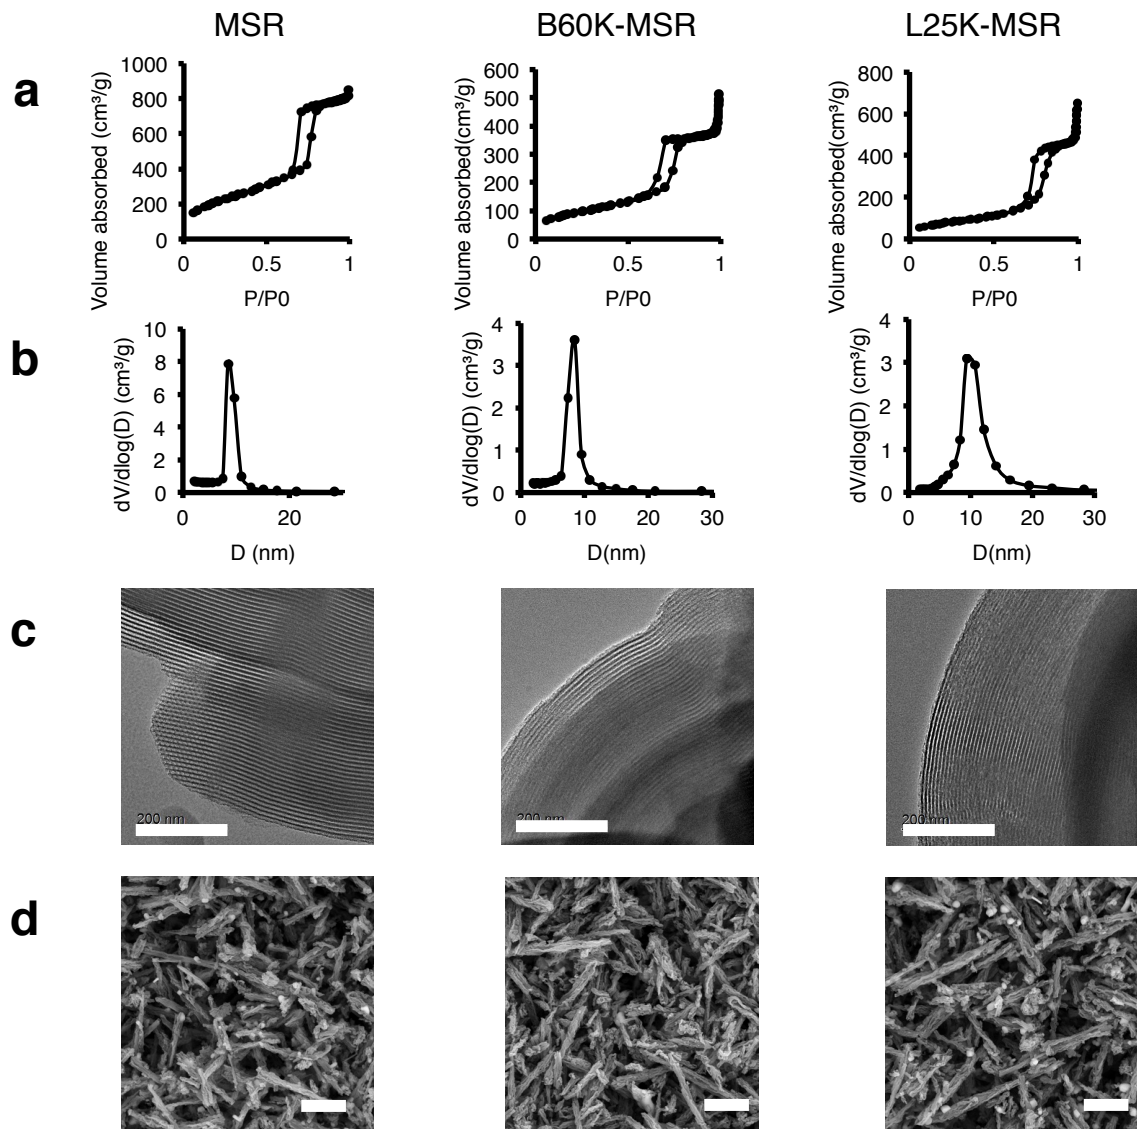

**Supplementary Figure 1: Characterization of MSRs with and without PEI adsorption.** (a) Nitrogen sorption isotherms, (b) BET pore size, (c) TEM images (scale bar = 200nm) and (d) SEM images (scale bar = 20um) of various MSRs or MSR-PEIs

**a**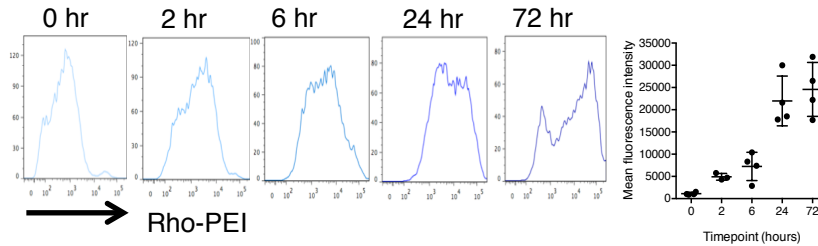**b**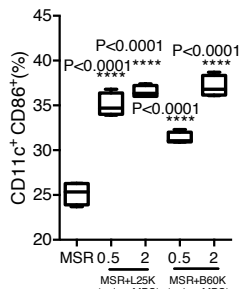**c**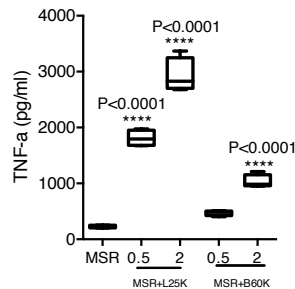

**Supplementary Figure 2: BMDC uptake kinetics of PEI and stimulation by MSR-PEI.** (a) Flow cytometry analysis of rhodamine<sup>+</sup> murine BMDCs after stimulating with soluble Rhodamine-PEI for 0, 2, 6, 24 and 72 hours (n=4). (b). Flow cytometry analysis of CD86 expression on murine BMDCs after 24 hours of stimulation with 40ug MSR particles (MSR) or 40ug MSR-PEI particles containing 0.5ug or 2ug of B60K or L25K PEI (n=4, compared to MSR by two-way ANOVA). (c) ELISA analysis of TNF-α concentration in murine BMDC supernatant after 24 hours of stimulation with 40ug MSR particles (MSR) or 40ug MSR-PEI particles containing 0.5ug or 2ug of B60K or L25K PEI (n=4, compared to MSR by two-way ANOVA).

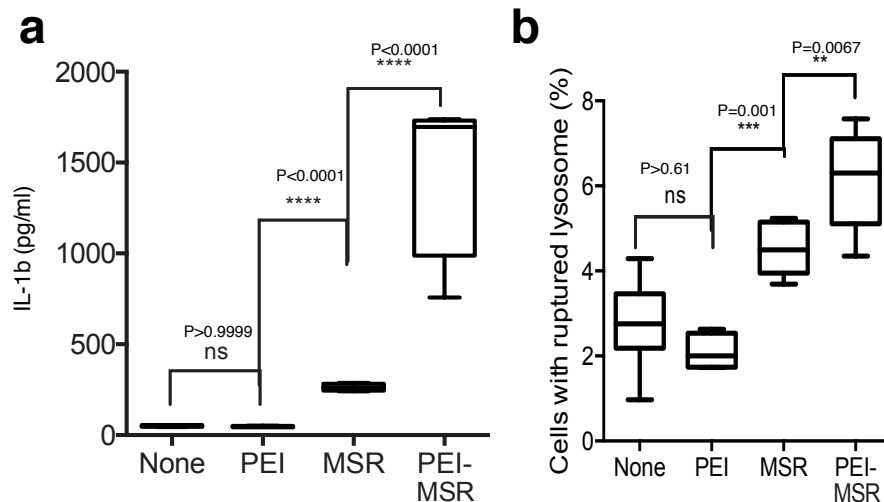

**Supplementary Figure 3: MSR-PEI particles activate the inflammasome through lysosomal disruption.** (a) ELISA analysis of IL-1b concentration in murine BMDC supernatant after 18 hours of stimulation with 0.8 ug free L25K PEI, 40 ug MSR, or 40ug of MSR-PEIs (20ug L25K/mg MSR), or left untreated (n=4, one-way ANOVA). (b) Flow cytometry analysis of BMDCs stained with acridine orange after 18 hours of stimulation with 0.8 ug free L25K PEI, 40 ug bare MSR, or 40ug of MSR-PEIs (20ug L25K/mg MSR), or left untreated (n=4 for PEI, n=8 for all else, one-way ANOVA). Cells with ruptured lysosome indicates the loss of lysosomal staining with acridine orange.

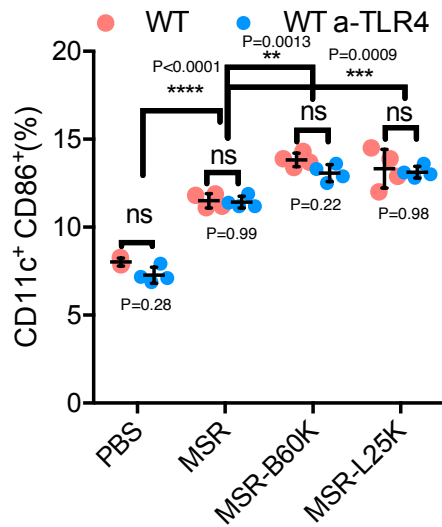

**Supplementary Figure 4: Effect of TLR-4 neutralization on BMDC activation.** (a) Flow cytometry analysis of CD11c and CD86 expression in BMDCs pretreated with a-TLR4 (WT a-TLR4) or nothing (WT) and stimulated with PBS, MSRs, MSRs adsorbed with B60K PEI (MSR-B60K) or MSRs adsorbed with L25K PEI (MSR-L25K). n=4, \* indicates comparison within a-TLR4 groups, ns between WT and a-TLR4 groups by two-way ANOVA. Data depicts mean +/- sd

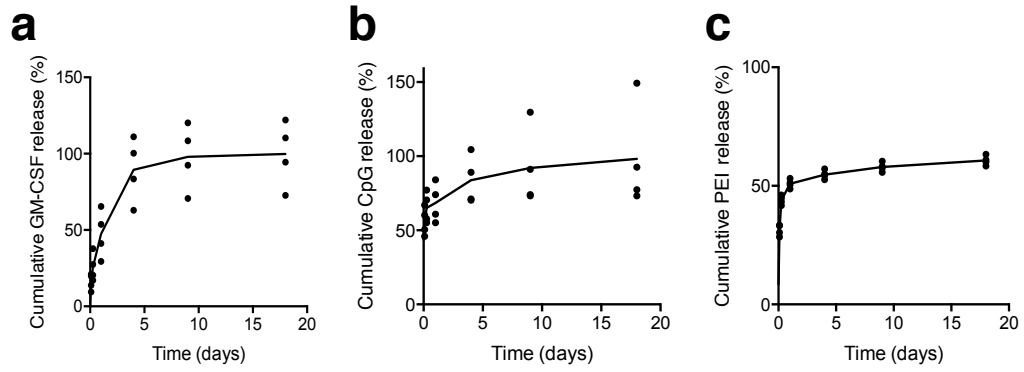

**Supplementary Figure 5:** In vitro release of (a) GM-CSF, (b) CpG-ODN and (c) L25K PEI in complete media. n=4

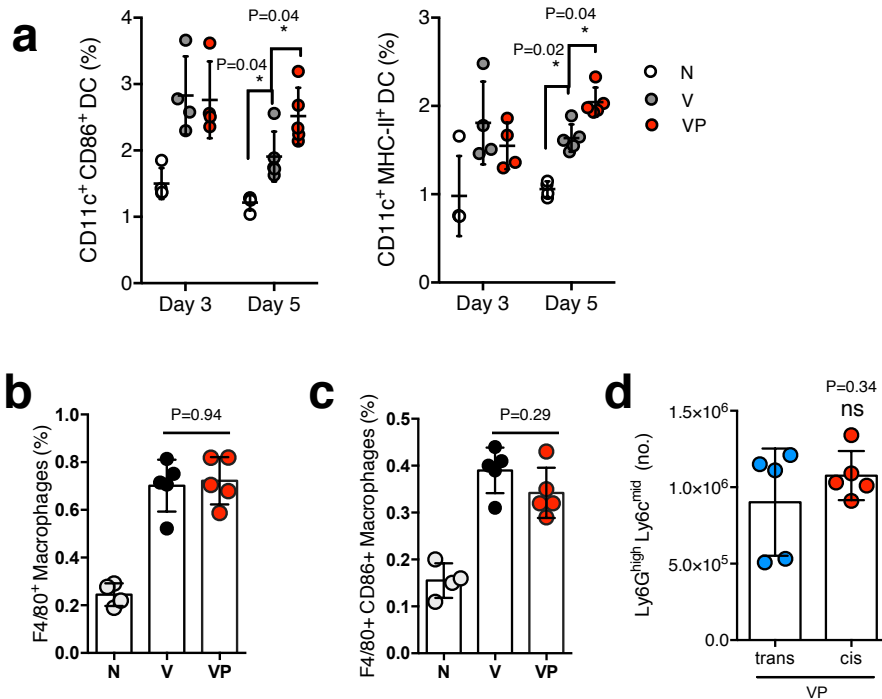

**Supplementary Figure 6: Lymph node analysis after immunization.** Percentage of (a) CD11c<sup>+</sup> CD86<sup>+</sup> or CD11c<sup>+</sup> MHC-II<sup>+</sup> activated DCs (n=4 for day 3, n=5 for day 5, two-way ANOVA), (b) F4/80<sup>+</sup> macrophages and (c) F4/80<sup>+</sup> CD86<sup>+</sup> activated macrophages in the dLN on day 5 post immunization with the MSR vaccine (V) or the MSR-PEI vaccine (VP) or left unimmunized (N) (n=5, n=4 for N, one-way ANOVA). (d) Total number of Ly6G<sup>+</sup> Ly6C<sup>mid</sup> myeloid cells/neutrophils at the vaccine site explanted on day 3 post immunization with the trans MSR-PEI vaccine (trans, VP) or the cis MSR-PEI vaccine (cis, VP) (n=5, student T test). Data depicts mean +/- sd

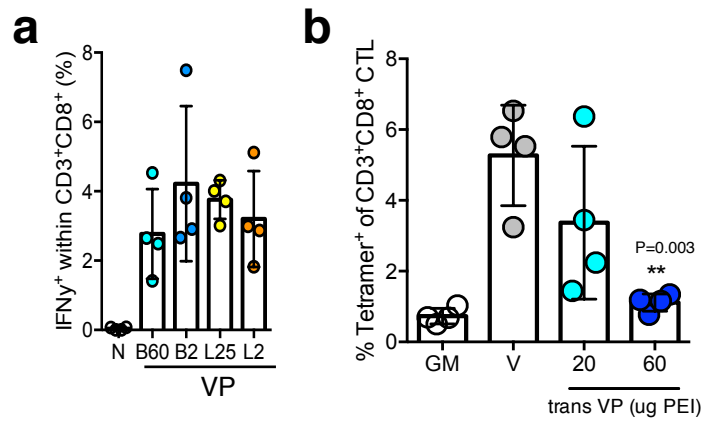

**Supplementary Figure 7: CTL response induced by MSR PEI vaccines.** (a) Percentage of IFN $\gamma^+$  CD8 $^+$  T cells isolated from peripheral blood on day 7 after immunization with the MSR-PEI vaccine containing Branched 60K (B60), Branched 2K (B2), Linear 25K (L25) or Linear 2K (L2) PEI or left unimmunized, and subsequently stimulated with SIINFEKL (n=4). (b) Percentage of tetramer $^+$  CD8 $^+$  T cells in peripheral blood on day 7 after immunization with MSRs delivering only GM-CSF (GM), the MSR vaccine (V), trans MSR-PEI vaccines containing 20ug (trans VP 20) or 60ug (trans VP 60) of B60K PEI (n=4, one-way ANOVA). Data depicts mean +/- sd



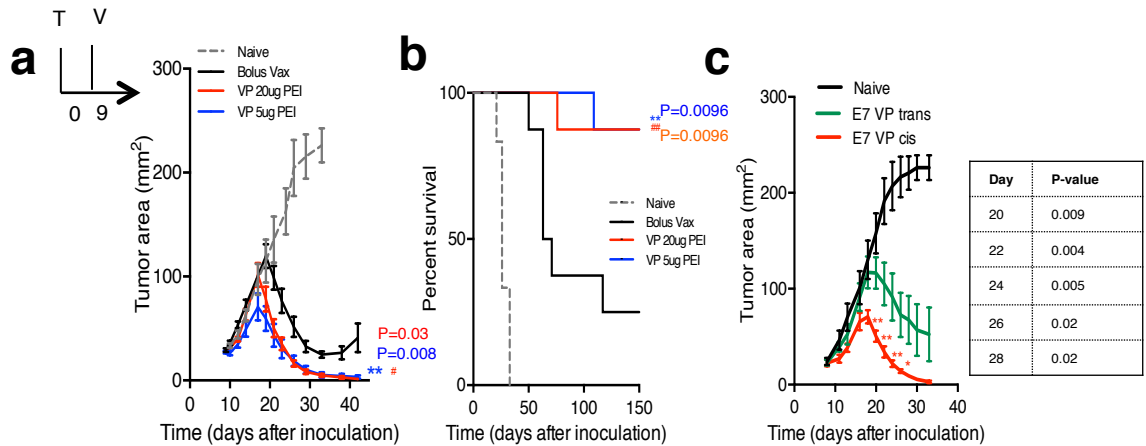

**Supplementary Figure 8: Therapeutic E7 expressing tumor study.** (a) Tumor growth and (b) overall survival of mice bearing established E7 expressing TC-1 tumors (allowed to develop for 9 days) and treated with a bolus vaccine (Bolus Vax; 1ug GM-CSF, 50ug E7, 100ug CpG), or the MSR-PEI vaccine (VP; 5mg MSR, 1ug GM-CSF, 100ug CpG, 50ug E7) with either 5ug or 20ug of L25K PEI (n=6 for Naive, n=8 for Bolus, VP 5ug and VP 20ug, \*denotes between VP 5ug and Bolus Vax, # denotes between VP 20ug and Bolus Vax by one-way ANOVA (a) and by Log-rank Test (b)). (c) Tumor growth in mice bearing established E7 expressing TC-1 tumors (allowed to develop for 8 days) and treated with the trans MSR- PEI vaccine (E7 VP trans) or the cis MSR-PEI vaccine (E7 VP cis), or left untreated (N) (n=5, between E7 VP trans Vax and E7 VP cis Vax by two-way ANOVA) . In (a and c), data depicts mean +/- sem

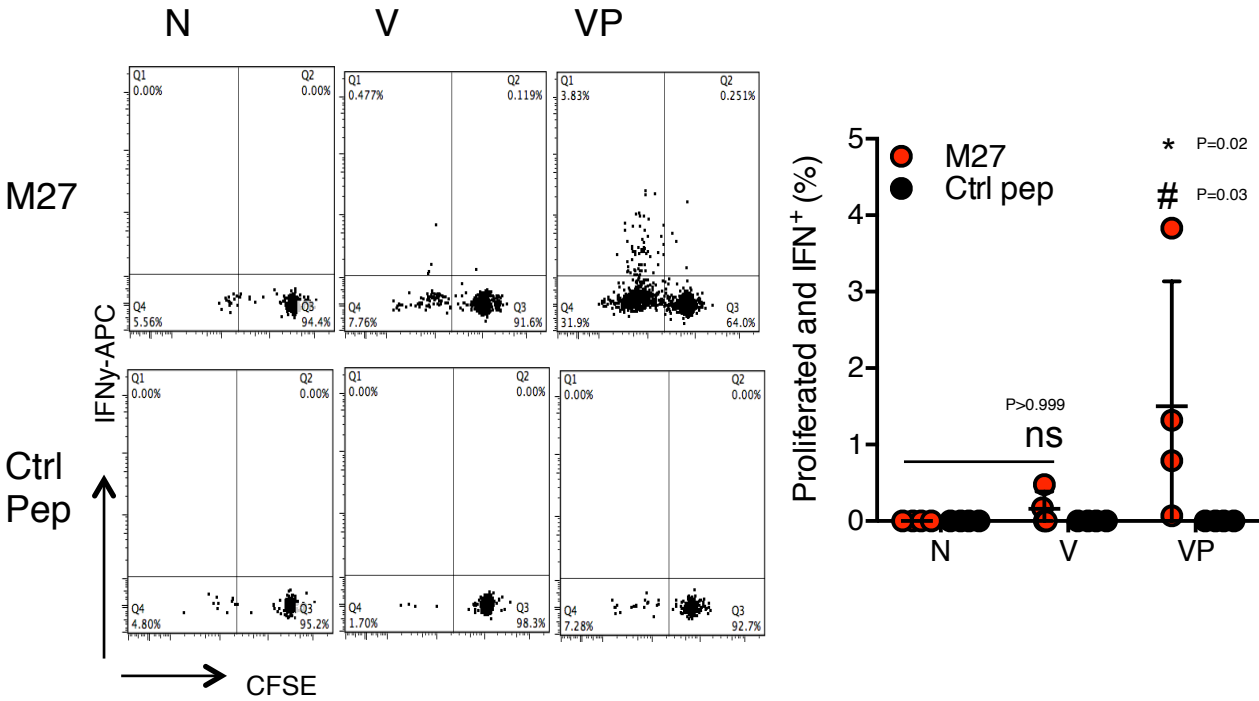

**Supplementary Figure 9: MSR-PEI vaccine enhances CD8 T cell response towards B16 neoantigen.** Percentage of proliferating and IFN $\gamma$ <sup>+</sup> splenic CD8 T cells in response to M27 or a control peptide 8 days after vaccination with the MSR vaccine (V), the MSR-PEI vaccine (VP) or left untreated (Naive). Data depicts mean  $\pm$  sd, n=4, \* denotes between VP and N, # denotes between VP and V, ns between V and N by two-way ANOVA

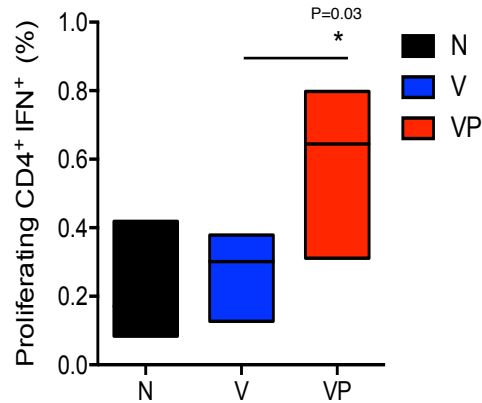

**Supplementary Figure 10: MSR-PEI vaccine enhances CD4 T cell response towards B16 neoantigen in tumor bearing animals.** Mice were vaccinated with the MSR vaccine (V), the MSR-PEI vaccine (VP) using L25K PEI and 50ug of the B16 neoantigens (M27 and M30), or left untreated (Naive). On day 14 after vaccination, mice were inoculated with B16F10 tumors. On day 10 after tumor inoculation, T cells were isolated and assessed for percentage of proliferating and IFN $\gamma$ <sup>+</sup> CD4<sup>+</sup> T cells in response to M30. Data depicts mean  $\pm$  sd, n=5, one-way ANOVA

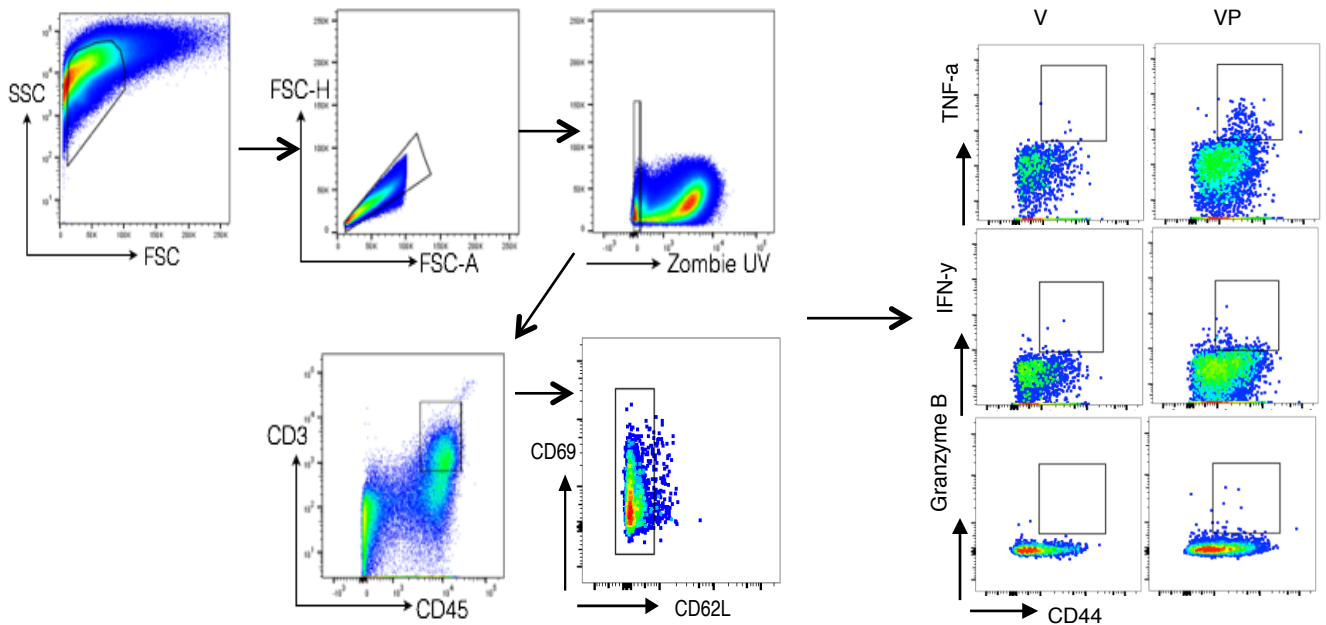

**Supplementary Figure 11: Primary gating strategy of TIL analysis.** Singlet cells were selected from the cell population and dead cells were then excluded. CD3<sup>+</sup>CD45<sup>+</sup> T cells were selected from the live cell population. Subsequently, CD62L low effector T cells were selected from the T cell population. Finally, CD44<sup>+</sup>TNFα<sup>+</sup>, CD44<sup>+</sup>IFNγ<sup>+</sup>, and CD44<sup>+</sup>Granzyme B<sup>+</sup> cells were analyzed.

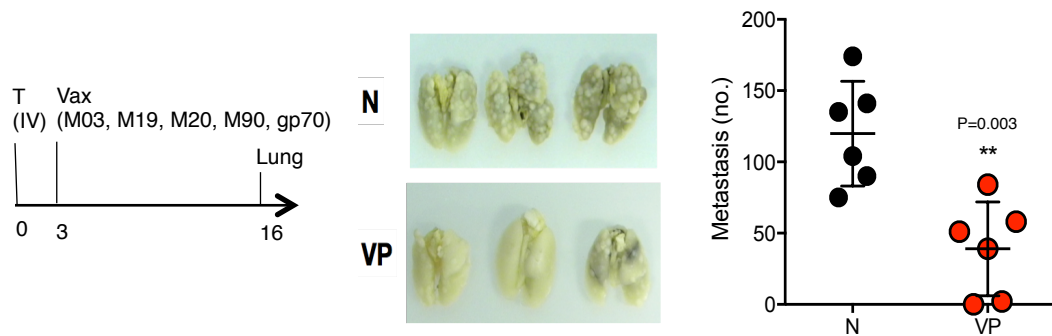

**Supplementary Figure 12: Therapeutic CT26 Lung metastasis.** Number of lung metastases formed after 16 days in mice that received IV inoculation of CT26 colorectal carcinomas ( $2 \times 10^5$  cells and allowed to develop for 3 days) and treated with the MSR-PEI vaccine (VP) using L25K PEI and 50ug of CT26 neoantigens or left untreated (N). Primary representative photographs of excised lungs are shown in the figure. Data depicts mean  $\pm$  sd and  $n=6$ . two-tailed T test.

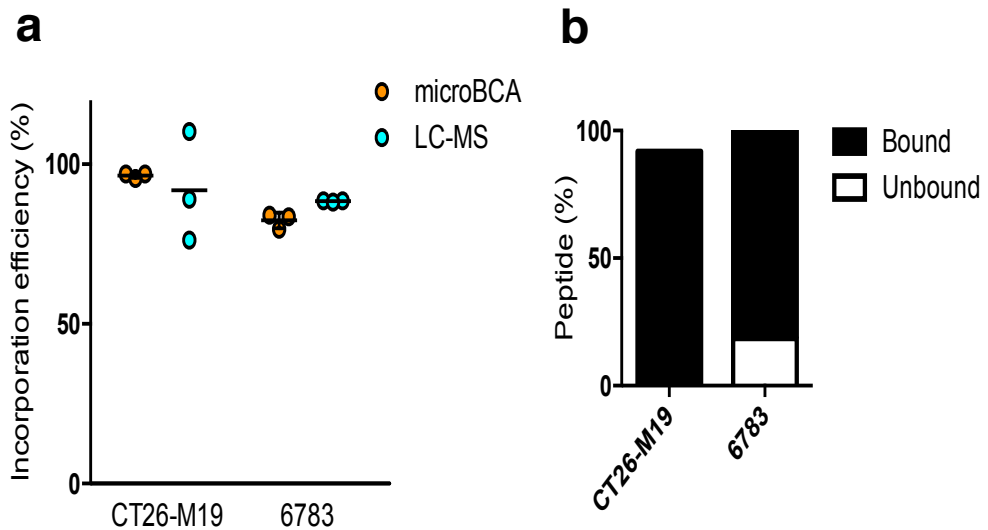

**Supplementary Figure 13: Measurement of peptide incorporation.** (a) Incorporation efficiency of neoantigens onto bare MSR determined using micro-BCA or HPLC LC-MS (mean +/- sd, n=3). (b) Quantification of unbound and bound peptides after loading onto bare MSRs.

**Supplementary Table 1:** BET pore volume and surface area of MSR-PEI particles

|          | <b>Surface area<br/>(m<sup>2</sup>/g)</b> | <b>Pore Volume<br/>(cm<sup>3</sup>/g)</b> |
|----------|-------------------------------------------|-------------------------------------------|
| MSR      | 778                                       | 1.26                                      |
| B60K-MSR | 341                                       | 0.64                                      |
| L25K-MSR | 285                                       | 0.79                                      |

**Supplementary Table 2:** Endotoxin level of MSR-PEI vaccine components

| <b>Sample</b> | <b>EU/vax</b> |
|---------------|---------------|
| MSR           | <0.05         |
| PEI L2K       | <0.05         |
| PEI L25K      | <0.05         |
| PEI B2K       | <0.05         |
| PEI B60K      | <0.05         |
| CpG-ODN       | <0.05         |
| GM-CSF*       | <0.1          |
| E7            | <0.05         |
| B16-M30       | <0.05         |
| B16-M67       | <0.05         |
| B16-M98       | <0.05         |
| CT26-M03      | <0.05         |
| CT26-M19      | <0.05         |
| CT26-M20      | <0.05         |
| CT26-M90      | <0.05         |
| CT26-GP70     | <0.05         |

\* Endotoxin level obtained from Manufacturer (Peprotech)



**Supplementary Table 3:** Loading efficiency of vaccine components in the cis MSR-PEI (cis VP) and trans MSR-PEI (trans VP) vaccines

|        | <b>cis VP<br/>(%, mean +/- sd)</b> | <b>trans VP<br/>(%, mean +/- sd)</b> |
|--------|------------------------------------|--------------------------------------|
| GM-CSF | 99.6 +/- 0.1                       | 99.7 +/- 0.02                        |
| CpG    | 56.5 +/- 8.9                       | 62.8 +/- 0.99                        |
| E7     | 98.2 +/- 0.5                       | 98.2 +/- 0.9                         |
| OVA    | 86.3 +/- 0.6                       | 81.5 +/- 0.5                         |

**Supplementary Table 4: Peptide information**

| <b>Name</b>         | <b>Sequence</b>                     | <b>Origin</b>    |
|---------------------|-------------------------------------|------------------|
| E7 <sub>43-77</sub> | GQAEPDRAHYNIVTFCCKCDSTLRLCVQSTHVDIR | HPV E6/E7        |
| E7 <sub>49-57</sub> | RAHYNIVTF                           | HPV E7           |
| B16-M27             | REGVELCPGNKYEMRRHGTTTHSLVIHD        | B16 neoantigen   |
| B16-M30             | PSKPSFQEFVDWENVSPELNSTDQPFL         | B16 neoantigen   |
| B16-M47             | GRGHLLGRLAAIVGKQVLLGRKVVVVR         | B16 neoantigen   |
| B16-M48             | SHCHWNDLAVIPAGVVHNWDFEPRKVS         | B16 neoantigen   |
| CT26-M03            | DKPLRRNNSYTSYIMAICGMPLDSFRA         | CT26 neoantigen  |
| CT26-M19            | QAIVRGCSMPGPWRSRLLVSRWSVE           | CT26 neoantigen  |
| CT26-M20            | PLLPFYPPDEALEIGLELNSSALPTE          | CT26 neoantigen  |
| CT26-M90            | LHSGQNHLKEMAISVLEARACAAAGQS         | CT26 neoantigen  |
| GP70                | SPSYAYHQF                           | CT26 antigen     |
| 6941                | AHRQGEKQHLLPVFSRLALRLPWRHSVQL       | Human neoantigen |
| 6942                | VSWGKKVQPIDSILADWNEDIEAFEMMEKD      | Human neoantigen |
| 6943                | DMAWRRNSRLYWLKIMVEQWQEHLPSLSS       | Human neoantigen |
| 6783                | LLTDRNTSGTTFTLLGVSDYPELQVPLFLVFLA   | Human neoantigen |
| 7412                | LRVFIGNIAVNHAPVSLRPGLGLPPGAPPGTVP   | Human neoantigen |

**Supplementary Table 5: Flow cytometry antibody information**

| <b>Antibody</b>                          | <b>Manufacturer</b>  | <b>Clone</b> |
|------------------------------------------|----------------------|--------------|
| Anti-mouse CD11c                         | eBioscience 17-0114  | N418         |
| Anti-mouse CD86                          | eBioscience 12-0862  | GL1          |
| Anti-mouse MHC-II                        | eBioscience 11-5322  | NIMR-4       |
| Anti-mouse CCR7                          | eBioscience 12-1971  | 4B12         |
| Anti-mouse SIINFEKL-<br>H2K <sup>b</sup> | eBioscience 25-5743  | 25-D1.16     |
| Anti-mouse IFN $\gamma$                  | eBioscience 17-7311  | XMG1.2       |
| Anti-mouse TNF $\alpha$                  | BD Bioscience 554420 | MP6-XP22     |
| Anti-mouse CD3e                          | Biolegend 100241     | 17A2         |
| Anti-mouse CD4                           | eBioscience 12-0042  | RM4-5        |
| Anti-mouse CD4                           | eBioscience 11-0042  | RM4-5        |
| Anti-mouse CD8a                          | eBioscience 53-0081  | 53-6.7       |
| Anti-mouse CD8a                          | Biolegend 100730     | 53-6.7       |
| Anti-mouse CD45                          | Biolegend 103107     | 30-F11       |
| Anti-mouse CD44                          | Biolegend 103049     | IM7          |
| Anti-mouse CD69                          | Biolegend 104521     | H1.2F3       |
| Anti-mouse CD62L                         | Biolegend 104441     | MEL-14       |
| Anti-mouse Granzyme B                    | eBioscience 25-8898  | NGZB         |
| Anti-mouse F4/80                         | eBioscience 2-4801   | BM8          |
| Anti-mouse Ly6G                          | eBioscience 11-5931  | RB6-8C5      |
| Anti-mouse Ly6C                          | Biolegend 128013     | HK1.4        |

**Supplementary Table 6: Details for statistical analyses.** F indicates F-values for ANOVA tests, T indicates t-values for t-tests, and df indicates degrees of freedom.

| Figure          | Analysis       | One-tail or two-tailed | F or T, df        |
|-----------------|----------------|------------------------|-------------------|
| Fig 1e (m30)    | Student T test | Two-tailed             | T=5.327 df=4      |
| Fig 1e (m20)    | Student T test | Two-tailed             | T=4.173 df=7      |
| Fig 1f (6783)   | Student T test | Two-tailed             | T=10.42, df=4     |
| Fig 1f (6942)   | Student T test | Two-tailed             | T=6.663, df=4     |
| Fig 1g          | One-way ANOVA  | Two-tailed             | F(4,15)=45.8      |
| Fig 1h          | One-way ANOVA  | Two-tailed             | F(4,15)=43.83     |
| Fig 1i          | One-way ANOVA  | Two-tailed             | F(4,15)=8.62      |
| Fig 1j          | One-way ANOVA  | Two-tailed             | F (3, 8) = 117.0  |
| Fig 2b          | Student T test | Two-tailed             | T=0.5084 df=6     |
| Fig 2c          | Student T test | Two-tailed             | T=5.148 df=6      |
| Fig 2d          | Student T test | Two-tailed             | T=3.742 df=6      |
| Fig 2e          | Student T test | Two-tailed             | T=3.254 df=6      |
| Fig 2f          | Two-way ANOVA  | Two-tailed             | F (2, 20) = 49.32 |
| Fig 2g (CD86)   | Two-way ANOVA  | Two-tailed             | F (2, 20) = 24.33 |
| Fig 2g (MHC-II) | Two-way ANOVA  | Two-tailed             | F (2, 20) = 33.69 |
| Fig 2h          | Two-way ANOVA  | Two-tailed             | F (2, 20) = 7.463 |
| Fig 2j          | Student T test | Two-tailed             | T=2.874 df=8      |
| Fig 2k          | Student T test | Two-tailed             | T=3.584 df=8      |
| Fig 2l          | Student T test | Two-tailed             | T=3.234 df=8      |
| Fig 3a          | One-way ANOVA  | Two-tailed             | F (2, 11) = 16.54 |
| Fig 3b          | One-way ANOVA  | Two-tailed             | F (2, 10) = 16.07 |
| Fig 3c          | Student T test | Two-tailed             | T=4.925 df=6      |
| Fig 3d          | One-way ANOVA  | Two-tailed             | F (4, 15) = 7.699 |
| Fig 3e          | One-way ANOVA  | Two-tailed             | F (2, 9) = 14.55  |
| Fig 3f          | One-way ANOVA  | Two-tailed             | F (3, 35) = 12.51 |
| Fig 4a          | One-way ANOVA  | Two-tailed             | F (3, 12) = 9.234 |
| Fig 4b          | One-way ANOVA  | Two-tailed             | F (3, 12) = 7.965 |

**Supplementary Table 6 continued:**

| <b>Figure</b>                 | <b>Analysis</b>               | <b>One-tail or two-tailed</b> | <b>F or T, df</b>  |
|-------------------------------|-------------------------------|-------------------------------|--------------------|
| Fig 4c                        | One-way ANOVA                 | Two-tailed                    | F (2, 11) = 7.977  |
| Fig 4d                        | Two-way ANOVA                 | Two-tailed                    | F (2, 250) = 371.3 |
| Fig 4e                        | Log-rank (Mantel-Cox) test    | N/A                           | N/A                |
| Fig 4f                        | Log-rank (Mantel-Cox) test    | N/A                           | N/A                |
| Fig 4h                        | Two-way ANOVA                 | Two-tailed                    | F (3, 278) = 311.7 |
| Fig 5a (TNFa)                 | One-way ANOVA                 | Two-tailed                    | F (2, 8) = 9.267   |
| Fig 5a (IFNy)                 | One-way ANOVA                 | Two-tailed                    | F (2, 8) = 4.477   |
| Fig 5a (Granzyme B)           | One-way ANOVA                 | Two-tailed                    | F (2, 8) = 7.587   |
| Fig 5b                        | Student T test                | Two-tailed                    | T=11.73 df=10      |
| Fig 5c                        | Student T test (AUC analyzed) | Two-tailed                    | T=2.585 df=14      |
| Fig 5d                        | Student T test                | Two-tailed                    | T=4.621 df=14      |
| Fig 5e                        | One-way ANOVA (AUC analyzed)  | Two-tailed                    | F (2, 22) = 7.624  |
| Supplementary Fig 2b          | Two-way ANOVA                 | Two-tailed                    | F (4, 12) = 79.42  |
| Supplementary Fig 2c          | Two-way ANOVA                 | Two-tailed                    | F (4, 12) = 339.6  |
| Supplementary Fig 3a          | One-way ANOVA                 | Two-tailed                    | F (3, 12) = 32.77  |
| Supplementary Fig 3b          | One-way ANOVA                 | Two-tailed                    | F (3, 24) = 27.05  |
| Supplementary Fig 4           | Two-way ANOVA                 | Two-tailed                    | F (3, 23) = 179.6  |
| Supplementary Fig 6a (CD86)   | Two-way ANOVA                 | Two-tailed                    | F (2, 20) = 21.40  |
| Supplementary Fig 6a (MHC-II) | Two-way ANOVA                 | Two-tailed                    | F (2, 20) = 17.75  |
| Supplementary Fig 6b          | One-way ANOVA                 | Two-tailed                    | F (2, 11) = 36.69  |
| Supplementary Fig 6c          | One-way ANOVA                 | Two-tailed                    | F (2, 11) = 29.28  |

**Supplementary Table 6 continued:**

| <b>Figure</b>        | <b>Analysis</b>              | <b>One-tail or two-tailed</b> | <b>F or T, df</b>   |
|----------------------|------------------------------|-------------------------------|---------------------|
| Supplementary Fig 6d | Student T test               | Two-tailed                    | T=1.010 df=8        |
| Supplementary Fig 7b | One-way ANOVA                | Two-tailed                    | F (3, 12) = 10.56   |
| Supplementary Fig 8a | One-way ANOVA (AUC analyzed) | Two-tailed                    | F (3, 26) = 25.49   |
| Supplementary Fig 8b | Log-rank (Mantel-Cox) test   | N/A                           | N/A                 |
| Supplementary Fig 8c | Two-way ANOVA                | Two-tailed                    | F (11, 132) = 42.78 |
| Supplementary Fig 9  | One-way ANOVA                | Two-tailed                    | F (2, 18) = 2.996   |
| Supplementary Fig 10 | One-way ANOVA                | Two-tailed                    | F (2, 12) = 6.675   |
| Supplementary Fig 12 | Student T test               | Two-tailed                    | T=4.011 df=10       |
